# Supplementary material for: Study on the time-resolved detection performance of β-Ga2O3-based SBUV photodetectors: surface chemical analysis and the impacts of non-VO factors
Source: Royal Society of Chemistry journal article supplement (doi:10.1039/d4tc03701d), 2024-11-08
Supplement: d4tc03701d1.pdf [file d4tc03701d1.pdf]

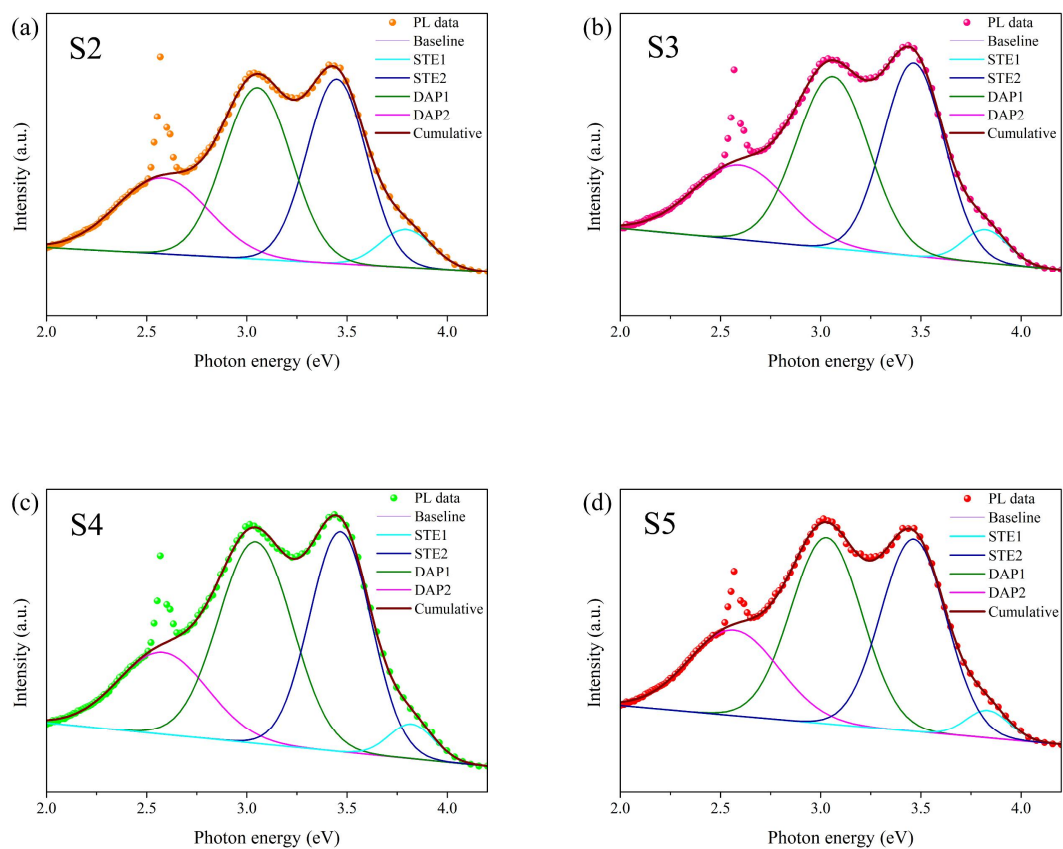

Fig. S11 The deconvolution for the PL spectra of (a) S2, (b) S3, (c) S4, and (d) S5.

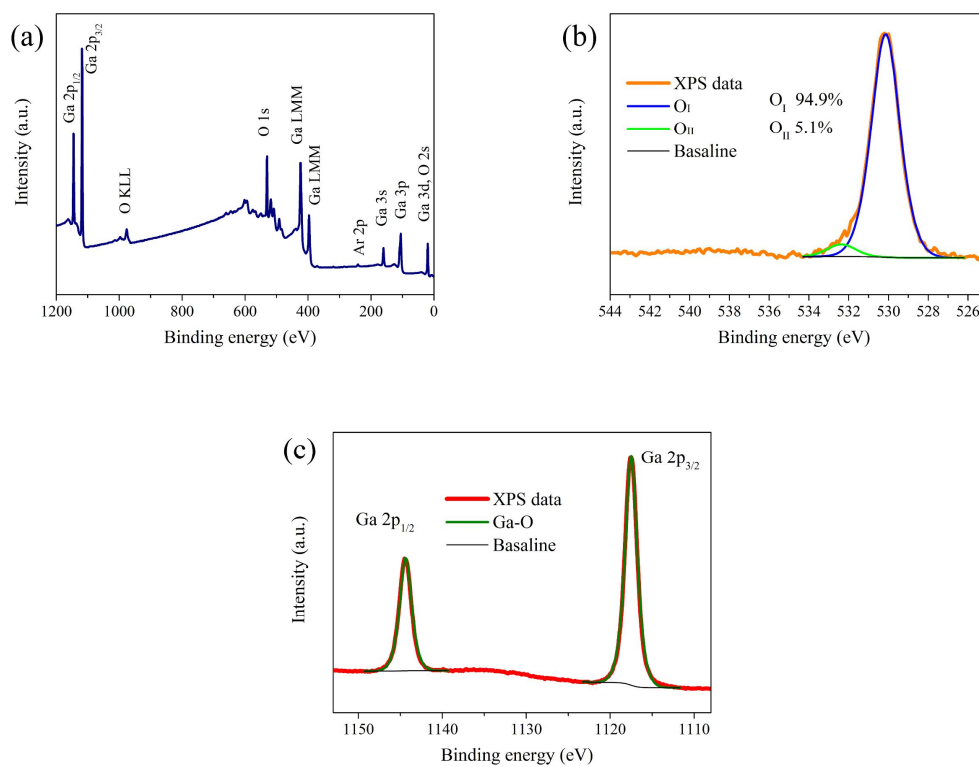

Fig. S12 XPS spectra of the  $\beta$ -Ga<sub>2</sub>O<sub>3</sub> homoepitaxial film: (a) full scan; (b) O 1s; (c) Ga 2p. \* To reduce potential interference caused by surface contaminants, an Ar<sup>+</sup> etching treatment lasting 30 seconds was conducted prior to the XPS analysis.
